# Supplementary material
Source: PubMed Central journal article supplement (PMC2828694)
Supplement: tpc.109.071837_1.pdf [file tpc.109.071837_1.pdf]

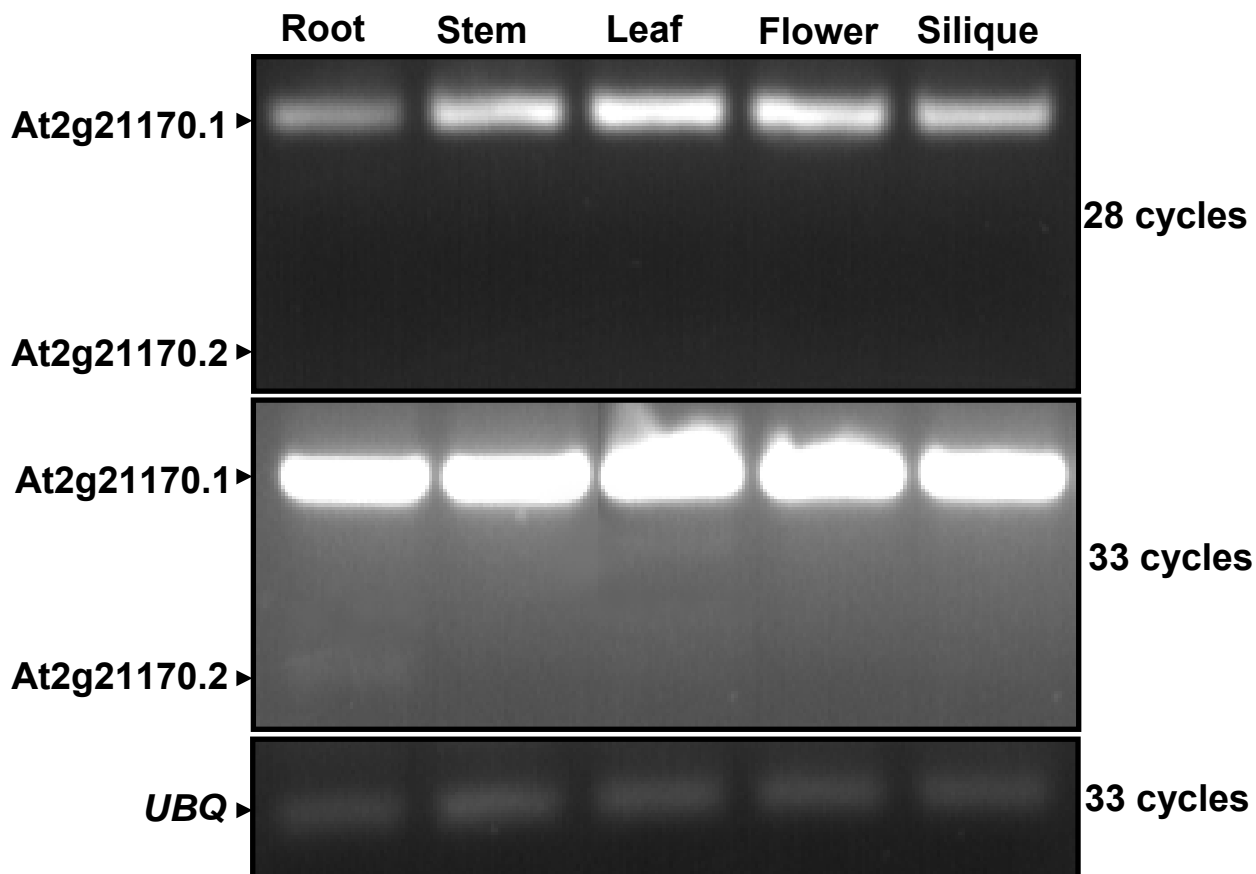

**Supplemental Figure 2.** Expression of alternatively spliced *pdTPI* transcripts.

Tissues were harvested from *Col* wild-type. RT-PCR was applied to detect transcript abundance. Primers S21170F and S21170R were used to amplify 122 bp and 95 bp fragments from splice variant 1 and splice variant 2, respectively. *UBQ* was used as loading control.

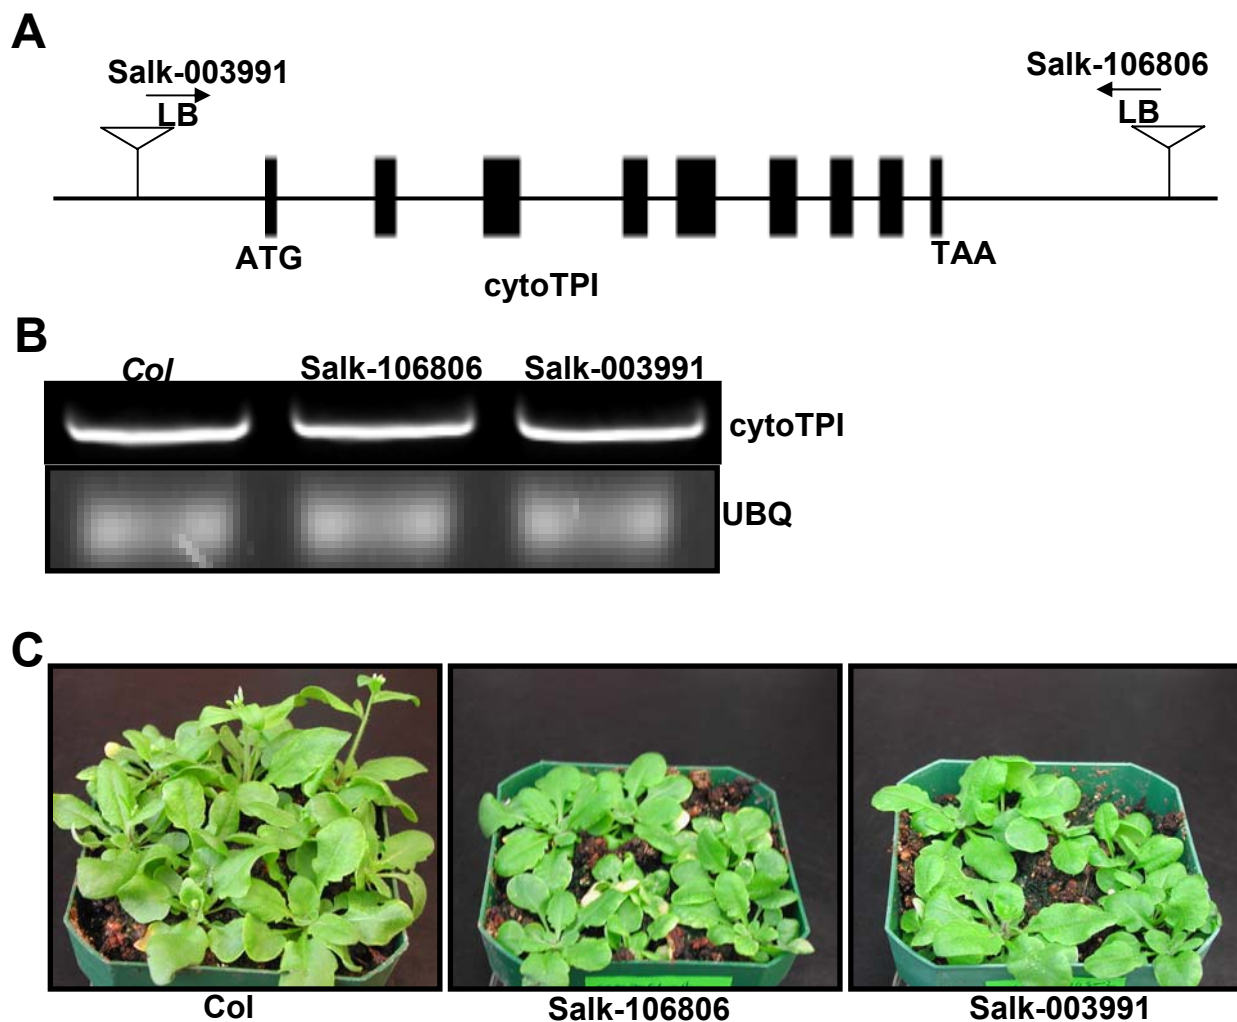

**Supplemental Figure 3.** CytoTPI mutant identification.

(A) Schematic representation of T-DNA insertion positions in At3g55440 gene. LB, T-DNA left border.

(B) *cytoTPI* gene expression was not affected in Salk-106806 and Salk-003991 T-DNA insertion lines.

(C) Salk-106806 and Salk-003991 appeared similar to wild type when grown for 7 weeks under long-day conditions.

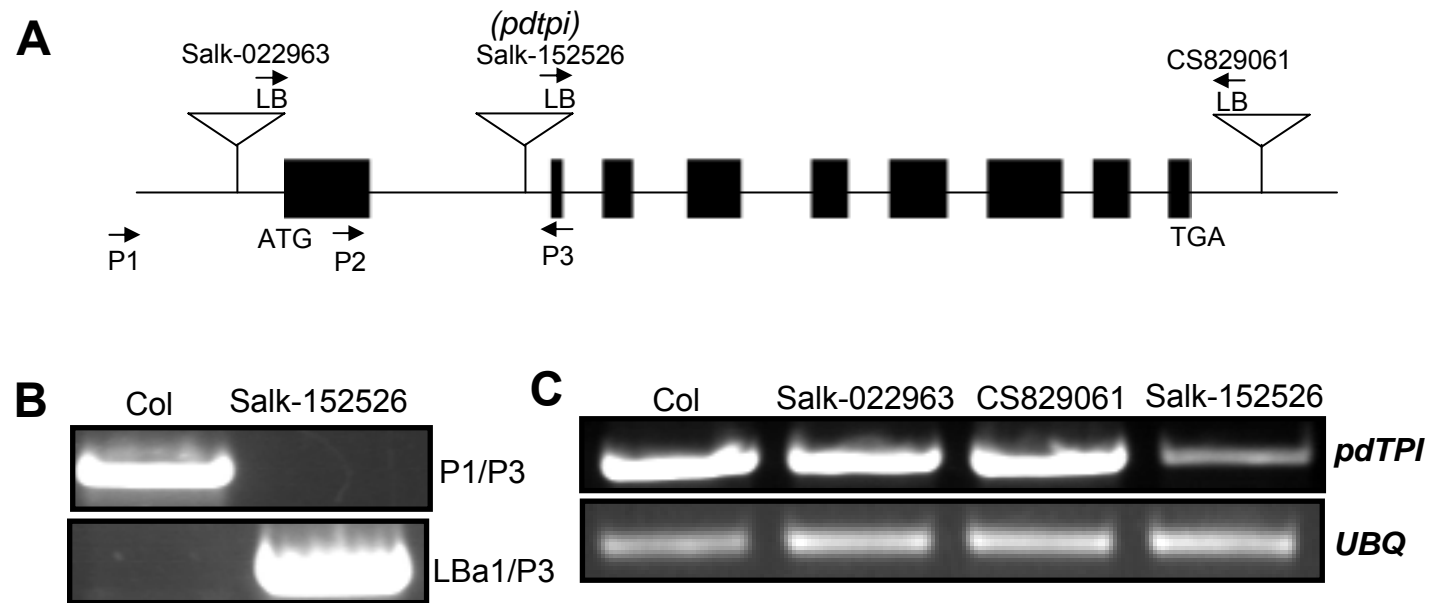

**Supplemental Figure 4.** Characterization of *pdtpi* mutant.

(A) Schematic representation of T-DNA insertion positions in At2g21170 gene. LB, T-DNA left border. The primer locations and directions were indicated here.

(B) T-DNA insertion in Salk-152526 was verified by PCR by combining T-DNA primer and plant gene-specific primers.

(C) RT-PCR results indicated that T-DNA insertion in Salk-152526 line reduced gene expression. *pdTPI* gene expression in Salk-022963 and CS829061, however, was not affected. *UBQ* was used as a control.

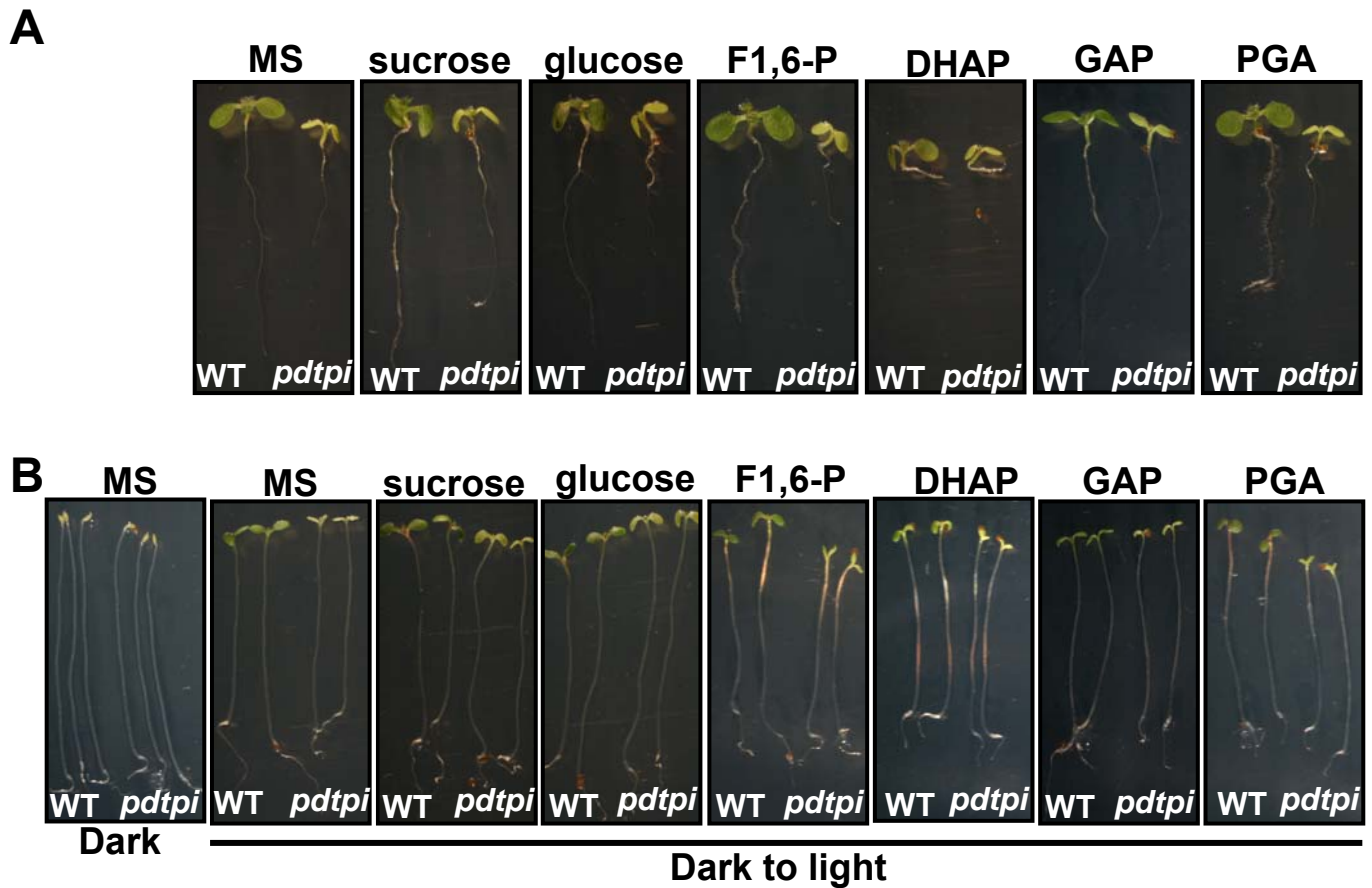

**Supplemental Figure 5.** Metabolite augmentation does not rescue the *pdtpi* mutant phenotype.

(A) Plants germinated on MS agar plates with the addition of 1 mM of sucrose, glucose, fructose-1, 6-bisphosphate (F-1,6-P), dihydroxyacetone phosphate (DHAP), DL-glyceraldehyde 3-phosphate (GAP) and D(-)-3-phosphoglyceric acid (PGA) for 5 d.

(B) Plants were first germinated on regular MS plates under darkness for 5 d, and then were transferred onto MS plates enriched with glycolytic intermediates and grown for an additional 2 d under continuous white light.



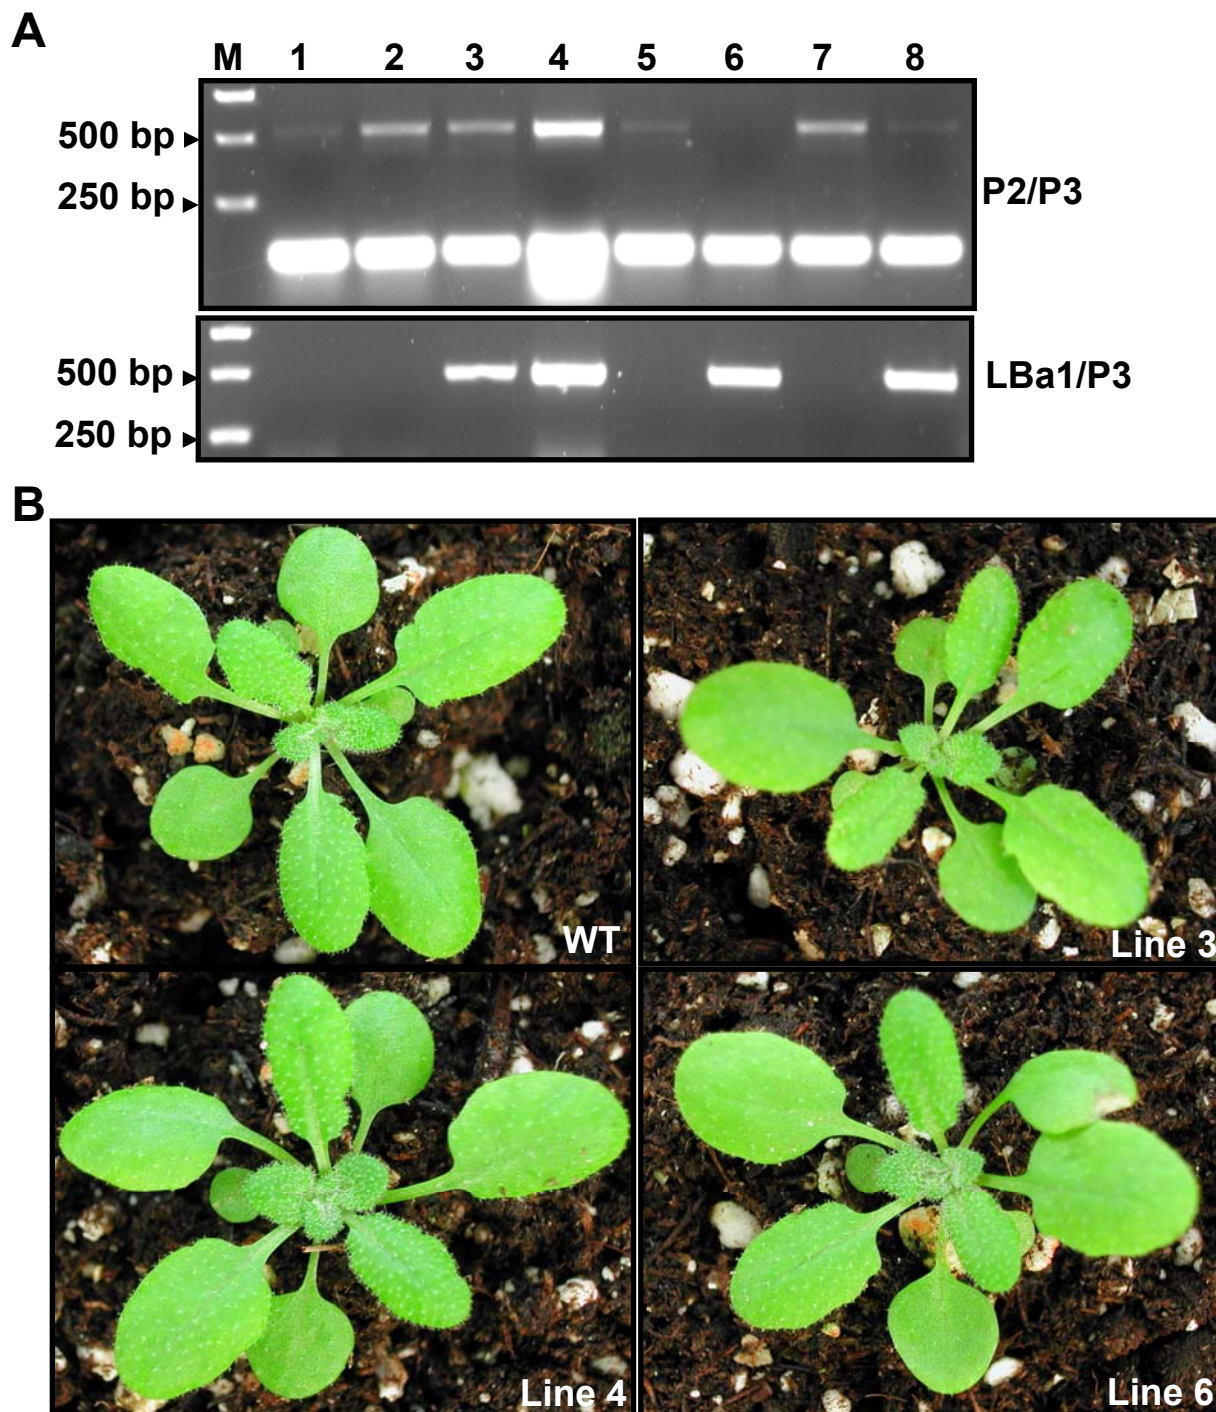

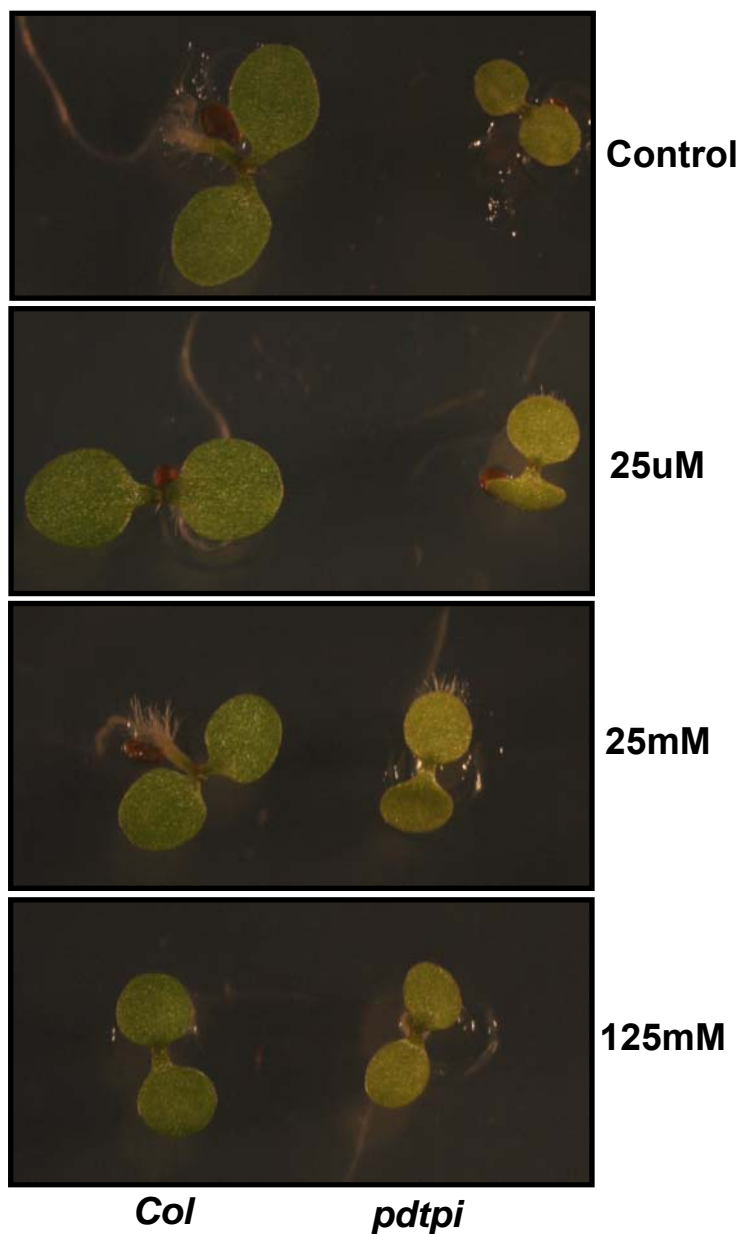

**Supplemental Figure 7.** *pdtpi* mutant can not be rescued by the application of myo-inositol. Wild type and *pdtpi* mutant were germinated on myo-inositol enriched MS plates for 5 d under continuous white light.

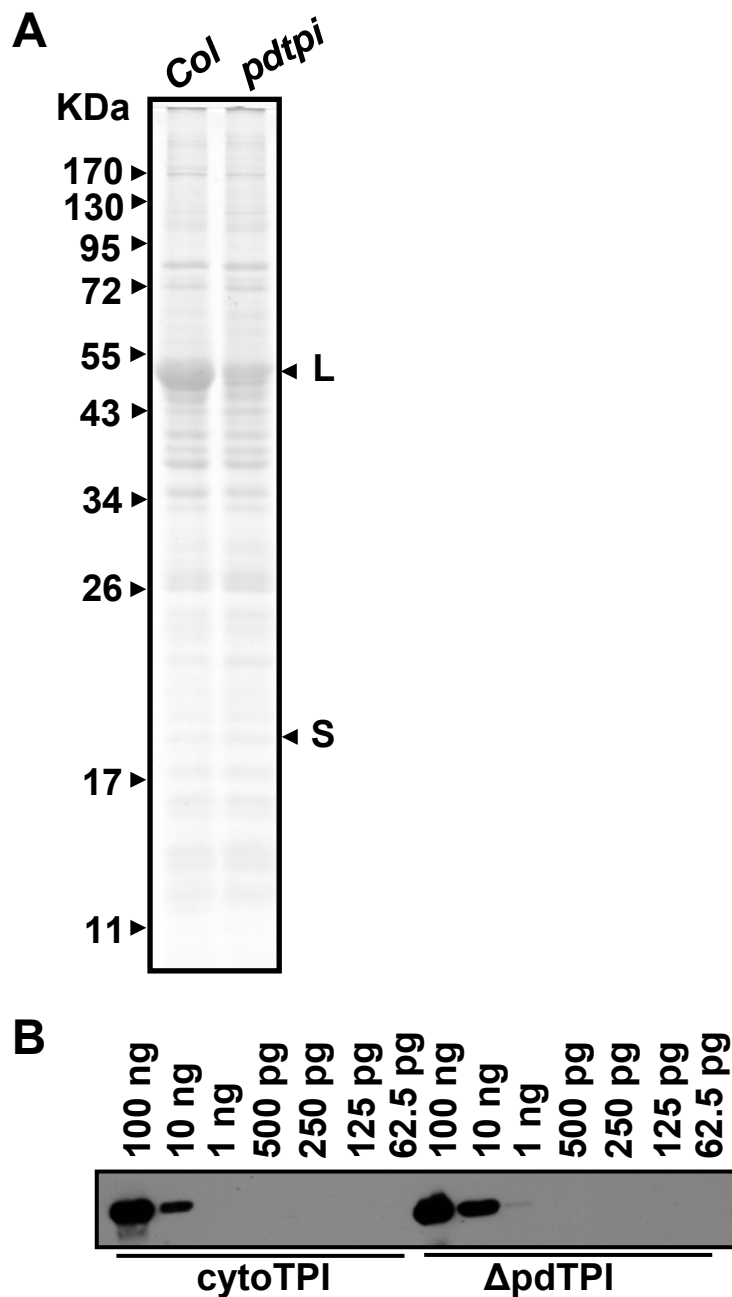

**Supplemental Figure 8.** Rubisco large subunit is down-regulated in the *pdtpi* mutant.

**(A)** Total protein from 5-d old seedlings was isolated and separated by SDS-PAGE. L: Rubisco large subunit, S: Rubisco small subunit. Anti-cytoTPI polyclonal antibody cross-reacts with pdTPI protein.

**(B)** Different amounts of purified, recombinant cytoTPI and  $\Delta$ pdTPI protein were separated by SDS-PAGE, transferred to nitrocellulose membrane and probed with anti-cytoTPI antibody.
